# Supplementary material for: Spatiotemporal Distribution Characteristics and Inventory Analysis of Near-Road Traffic Pollution in Urban Areas
Source: MDPI journal article supplement (doi:10.3390/atmos15040417), 2024-03-27
Supplement: s1 [file s1]

# Spatiotemporal Distribution Characteristics and Inventor Analysis of Near-Road Traffic Pollution in Urban Areas

Bingbing Li, Jiaren Li, Jiang Lu and Zhenyi Xu

**Table S1.** Atmospheric Sampler Parameters.

| parameters         | realm        | resolution (of a photo) | allowable error  |
|--------------------|--------------|-------------------------|------------------|
| sampling ow        | 0.1-1.0L/min | 0.01L/min               | $\leq \pm 2\%$   |
| sampling time      | 1min-99h59   | 1min                    | $\leq \pm 0.1\%$ |
| Thermostatic range | 15-30_C      | 0.1_C                   | $\leq \pm 2_C$   |

**Table S2.** Testing Instruments and Reagents.

|                                               |                                            |                                                              |                         |
|-----------------------------------------------|--------------------------------------------|--------------------------------------------------------------|-------------------------|
| Ion chromatograph<br>(Thermo Fisher, ICS-600) |                                            | Inductively coupled plasma mass spectrometer (Agilent, 7900) |                         |
| baseline noise                                | $\leq 0.005_S$ or $\leq 2\%FS$             | Mass axis stability                                          | $\pm 0.05$ amu/24 hours |
| baseline drift                                | $\leq 0.10_S/30min$ or $\leq 20\%FS/30min$ | Detection of light mass elements                             | $<0.5ppt$               |
| Minimum Detection Concentration               | $\leq 0.02_g/ml$                           | Detection of medium mass number elements                     | $<0.1ppt$               |
| Qualitative Repeatability                     | $\leq 1.5\%$                               | Detecting high mass count elements                           | $<0.1ppt$               |
| Quantitative Repeatability                    | $\leq 3\%$                                 | Short-term stability 10min(RSD)                              | $<1.5\%$                |
|                                               |                                            | Long-term stability 2 hr (RSD)                               | $<3\%$                  |

**Table S3.** Meteorological Statistics of Anqing City, 2020.

| Month | Temperature/_C | Humidity/% | Month | Temperature/_C | Humidity/% |
|-------|----------------|------------|-------|----------------|------------|
| 1     | 4.5            | 67         | 7     | 26.5           | 77         |
| 2     | 9              | 71         | 8     | 29.5           | 75         |
| 3     | 13             | 70         | 9     | 24             | 76         |
| 4     | 16.5           | 69         | 10    | 17             | 67         |
| 5     | 23.5           | 71         | 11    | 13             | 67         |
| 6     | 26.5           | 78         | 12    | 5.5            | 64         |

**Table S4.** Average annual pollutant emissions per vehicle (Gasoline).

| Vehicle type | Control type | CO(kg) | HC(kg) | NOx(kg) | PM2.5(kg) | PM10(kg) |
|--------------|--------------|--------|--------|---------|-----------|----------|
| Mini bus     | National I   | 412    | 28.94  | 8.66    | 0.59      | 0.65     |
|              | National II  | 94     | 16.72  | 11.07   | 0.25      | 0.27     |
|              | National III | 49     | 6.55   | 3.26    | 0.16      | 0.18     |
|              | National IV  | 24     | 2.54   | 0.82    | 0.07      | 0.07     |
|              | National V   | 16     | 1.90   | 0.44    | 0.07      | 0.07     |
| Medium bus   | National II  | 944    | 88.31  | 67.51   | 0.70      | 0.78     |
|              | National III | 244    | 20.08  | 19.73   | 0.43      | 0.47     |
|              | National IV  | 124    | 6.30   | 10.02   | 0.23      | 0.27     |
|              | National V   | 124    | 6.30   | 7.51    | 0.23      | 0.27     |
| Large bus    | National II  | 1894   | 224.53 | 219.39  | 5.22      | 5.80     |
|              | National III | 862    | 86.69  | 117.23  | 3.19      | 3.55     |
|              | National IV  | 437    | 45.60  | 73.40   | 3.19      | 3.55     |
| Light truck  | National I   | 1521   | 178393 | 81.78   | 2.25      | 2.50     |
|              | National II  | 1268   | 129.63 | 72.3    | 0.68      | 0.75     |
|              | National III | 303    | 31.48  | 21.00   | 0.41      | 0.45     |
|              | National IV  | 142    | 9.54   | 11.06   | 0.23      | 0.26     |
|              | National V   | 142    | 9.54   | 8.31    | 0.23      | 0.26     |

**Table S5.** Average annual pollutant emissions per vehicle (Diesel).

| Vehicle type | Control type | CO(kg) | HC(kg) | NOx(kg) | PM2.5(kg) | PM10(kg) |
|--------------|--------------|--------|--------|---------|-----------|----------|
| Mini bus     | National III | 5.83   | 0.77   | 29.88   | 0.55      | 0.62     |
|              | National IV  | 3.91   | 0.36   | 16.11   | 0.33      | 0.36     |
|              | National V   | 3.91   | 0.40   | 17.54   | 0.33      | 0.36     |
| Medium bus   | National III | 117    | 18.15  | 148     | 4.28      | 4.74     |
|              | National IV  | 97     | 15.76  | 135     | 2.14      | 2.38     |
|              | National V   | 97     | 15.76  | 115     | 1.07      | 1.19     |
| Large bus    | National III | 692    | 26.15  | 810     | 21.16     | 23.51    |
|              | National IV  | 318    | 8.58   | 923     | 9.41      | 10.46    |
|              | National V   | 158    | 4.33   | 806     | 4.71      | 5.23     |
| Light truck  | National II  | 174    | 107    | 345     | 7.10      | 7.89     |
|              | National III | 130    | 19.49  | 222     | 3.33      | 3.69     |
|              | National IV  | 74     | 7.72   | 113     | 1.04      | 1.14     |
|              | National V   | 74     | 7.72   | 96      | 0.21      | 0.23     |
| Medium truck | National III | 129    | 11.32  | 308     | 5.53      | 6.14     |
|              | National IV  | 97     | 4.99   | 245     | 2.23      | 2.48     |
|              | National V   | 97     | 4.99   | 208     | 0.45      | 0.50     |
| Large truck  | National III | 370    | 30.47  | 841     | 16.83     | 18.70    |
|              | National IV  | 278    | 13.38  | 670     | 6.67      | 7.39     |
|              | National V   | 278    | 13.38  | 569     | 1.30      | 1.45     |

**Table S6.** Concentrations of 15 Substances with Insignificant Changes.

| substance                     | concentration    | substance                            | concentration    | substance                |
|-------------------------------|------------------|--------------------------------------|------------------|--------------------------|
| Methyl mercaptan              | 0.026_0.026 ppbv | Dimethyl disulde                     | 0.064_0.061 ppbv | Undecane                 |
| N-Propanol                    | 0.133_0.137 ppbv | Diethylenetri-amine<br>chlorobenzene | 0.220_0.218 ppbv | Dodecane                 |
| Methyl Sulphide (ethanethiol) | 0.033_0.039 ppbv | Butyl acetate                        | 0.235_0.240 ppbv | N-Tridecane              |
| Ethyl chloride                | 0.025_0.027 ppbv | N-decane                             | 0.165_0.054 ppbv | 1,2-Dibromoethane        |
| Ethyl sulphide(butanethiol)   | 0.029_0.032 ppbv | Diethylaniline                       | 0.304_0.302 ppbv | Hexachloro-1,3-butadiene |

**Table S7.** Concentration of 8 Substances.

| substance           | concentration    | substance                 | concentration    |
|---------------------|------------------|---------------------------|------------------|
| Hexanethiol         | 0.080_0.046 ppbv | Methyl benzoate           | 0.068_0.092 ppbv |
| Triethylamine       | 0.207_0.219 ppbv | Trimethyl phosphate       | 0.636_0.296 ppbv |
| N-Propyl acetate    | 0.213_0.218 ppbv | 1,1,2,2-Tetrachloroethane | 0.314_0.169 ppbv |
| 1,3-Dichloropropene | 0.563_0.204 ppbv | 1,3-Butadiene             | 0.224_0.238 ppbv |

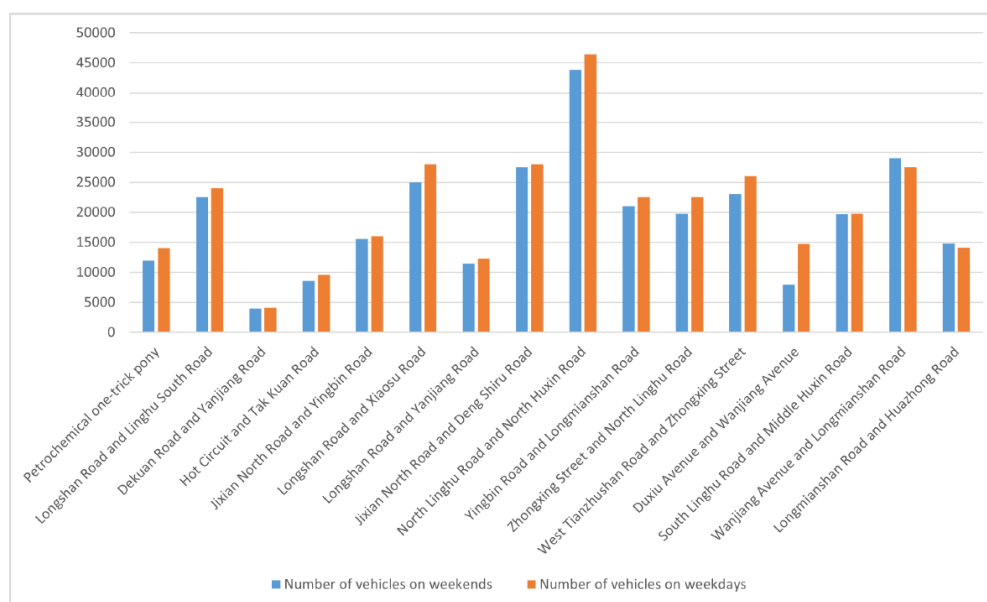**Figure S1.** Distribution of traffic flow at different traffic junctions.

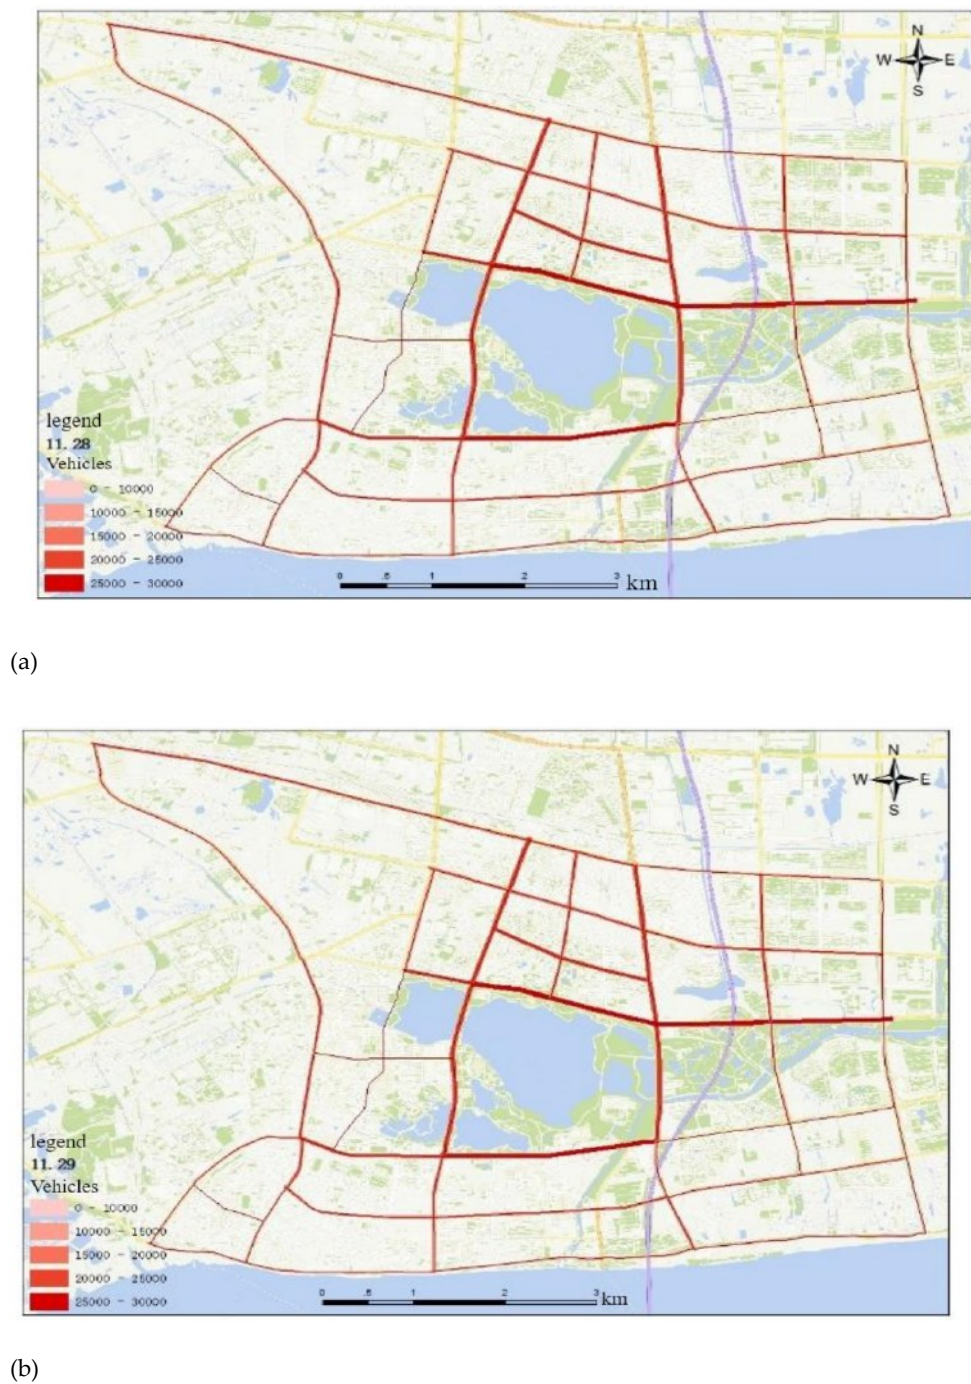

**Figure S2.** Visualization of mid-week and weekend traffic data: (a) Forecast of traffic flow on different major transportation routes in mid-week; (b) Weekend traffic volume forecasts for different key traffic corridors.

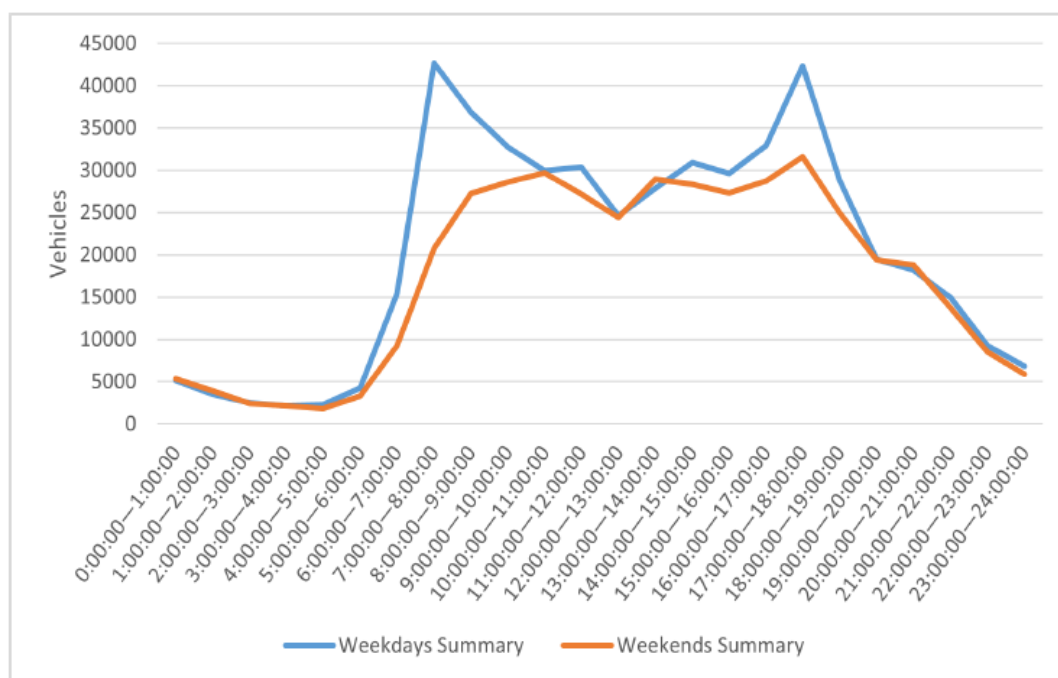

(a)

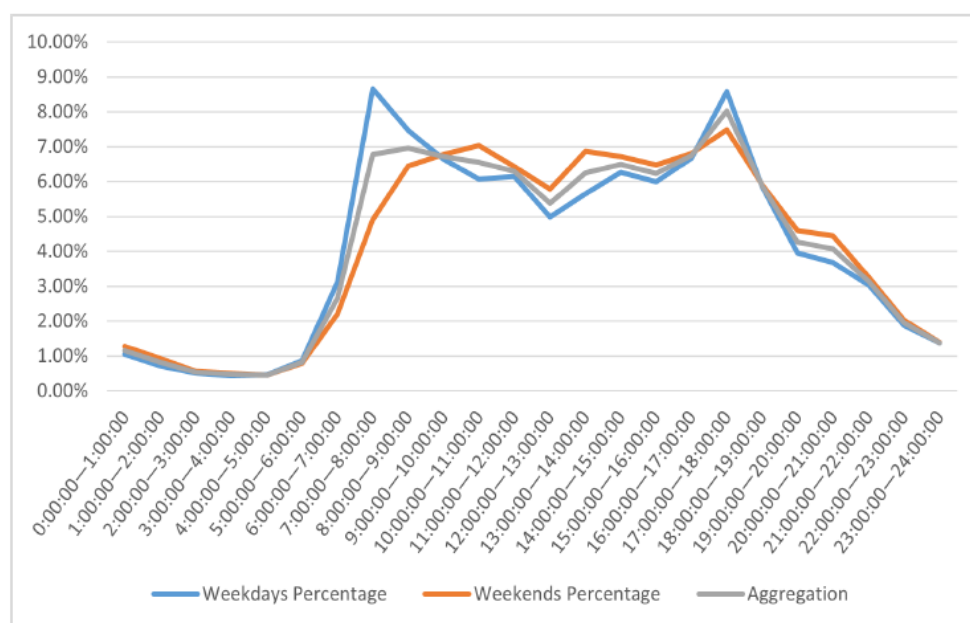

(b)

**Figure S3.** Characteristics of the temporal distribution of traffic flow data (a) Daily variation of traffic volume at key traffic intersections; (b) Percentage daily change in traffic volume at key traffic intersections.

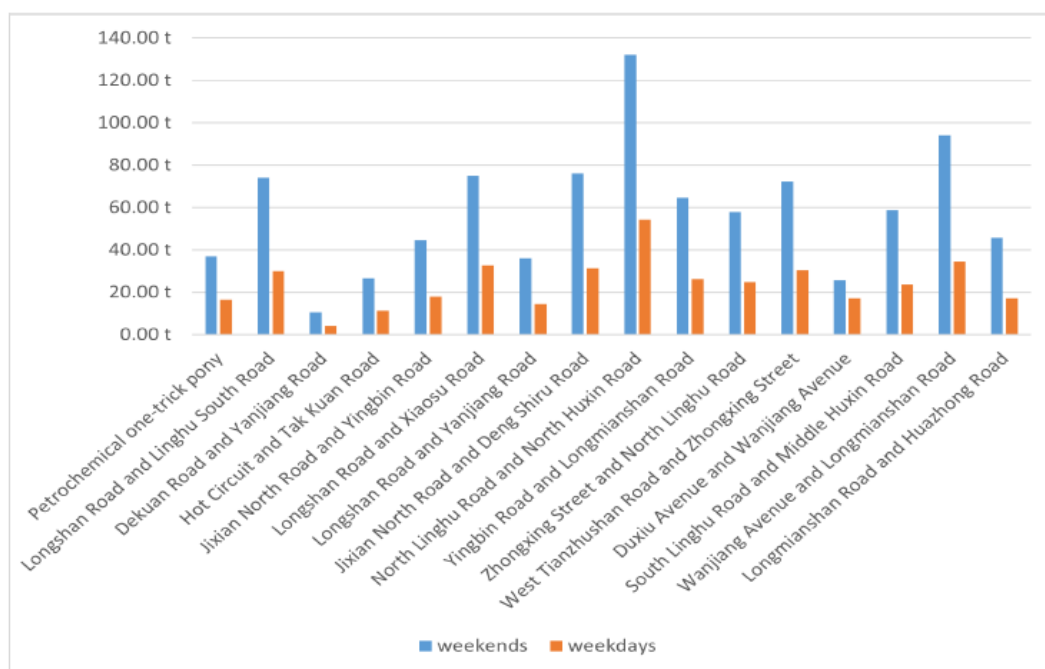

(a)

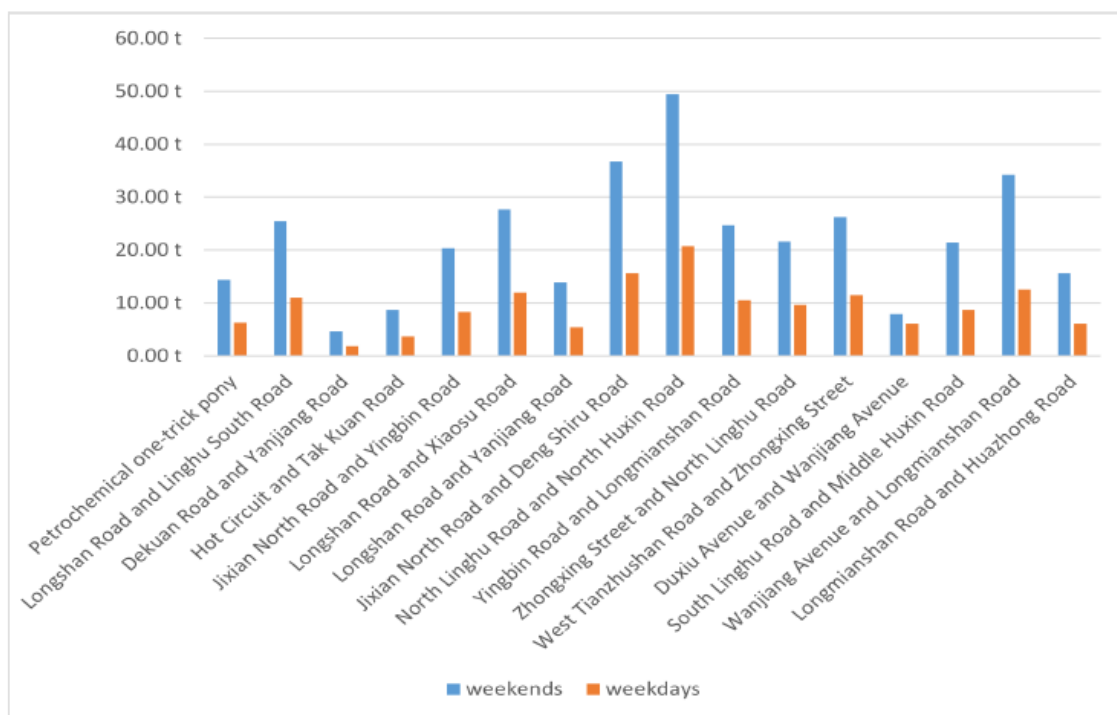

(b)

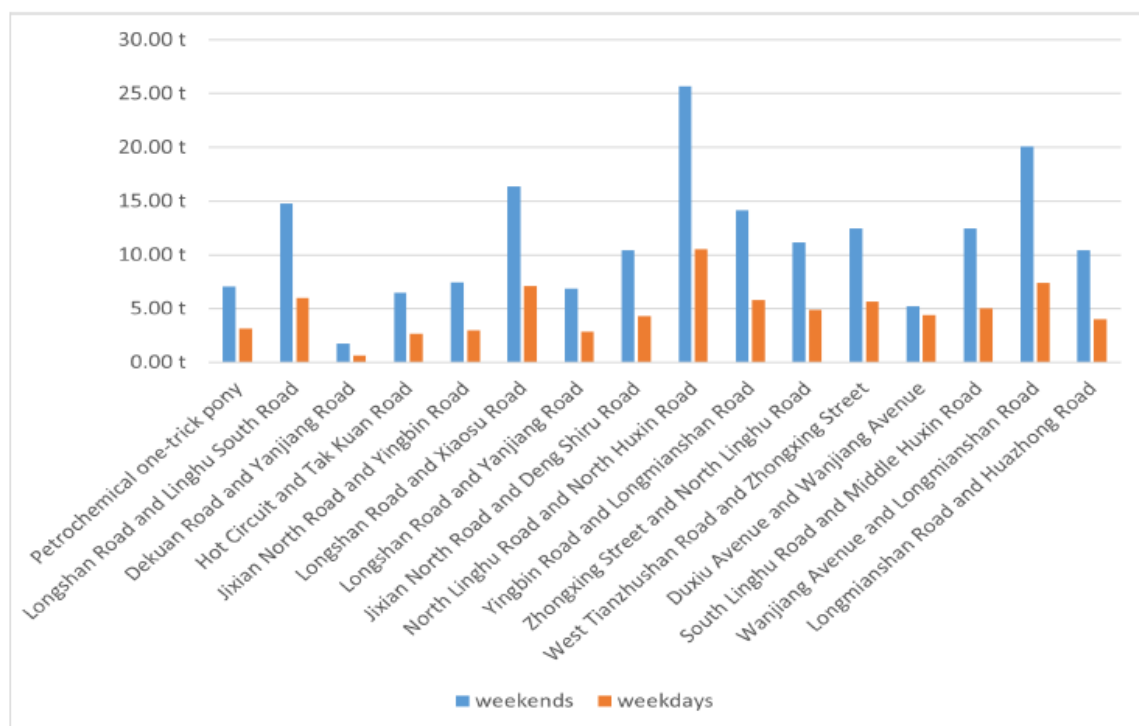

(c)

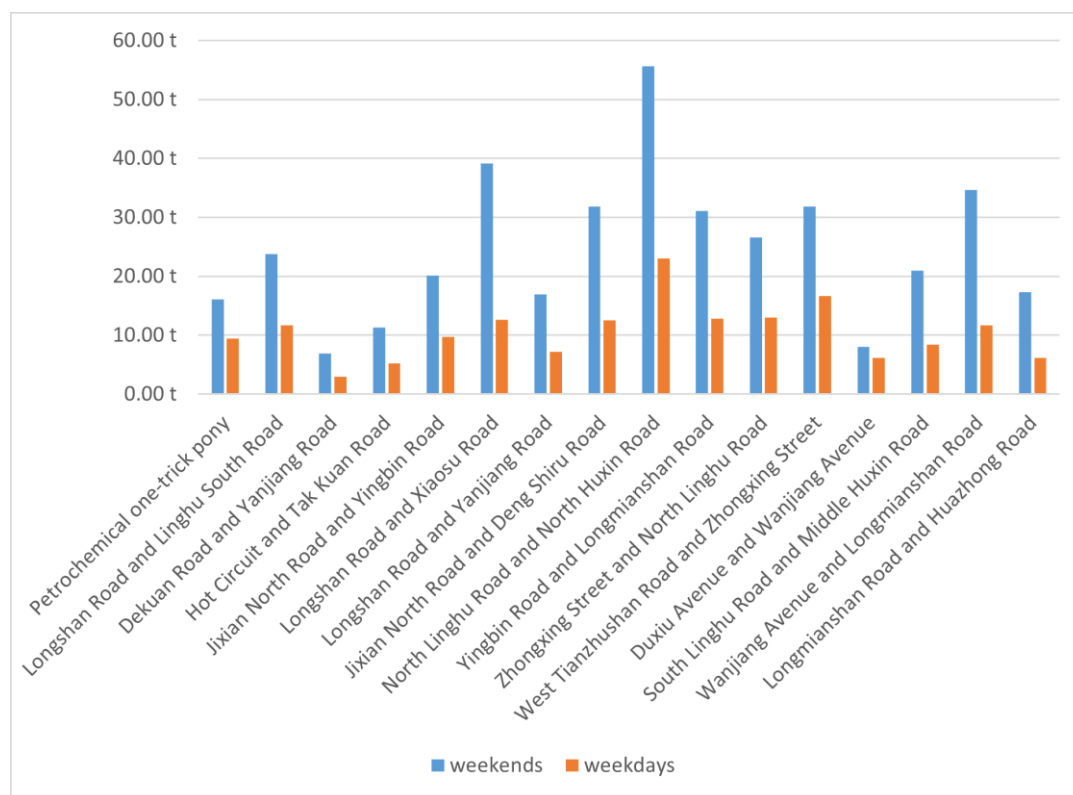

(d)

**Figure S4.** Characterization of the distribution of pollutant emissions from passing vehicles at intersections (a) Estimation of CO<sub>2</sub> emissions at traffic junctions (b) Estimation of CO emissions at traffic

junctions (c) Estimation of NO emissions at traffic junctions (d) Estimation of HC emissions at traffic junctions.

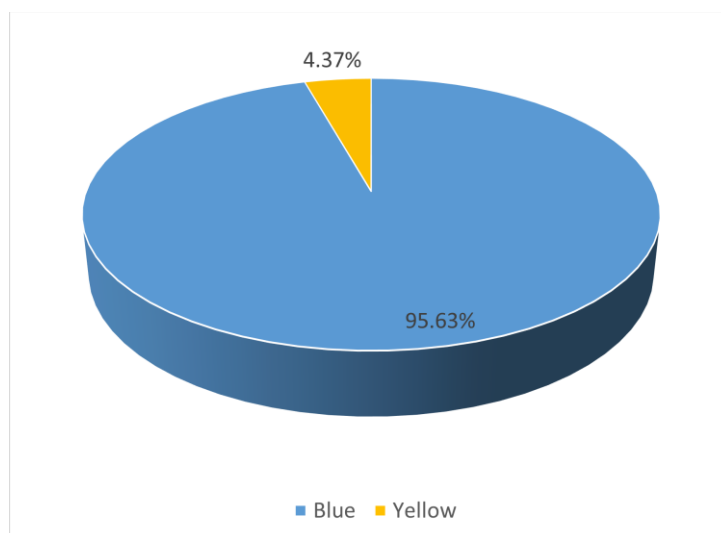

(a) Distribution of CO<sub>2</sub> emissions

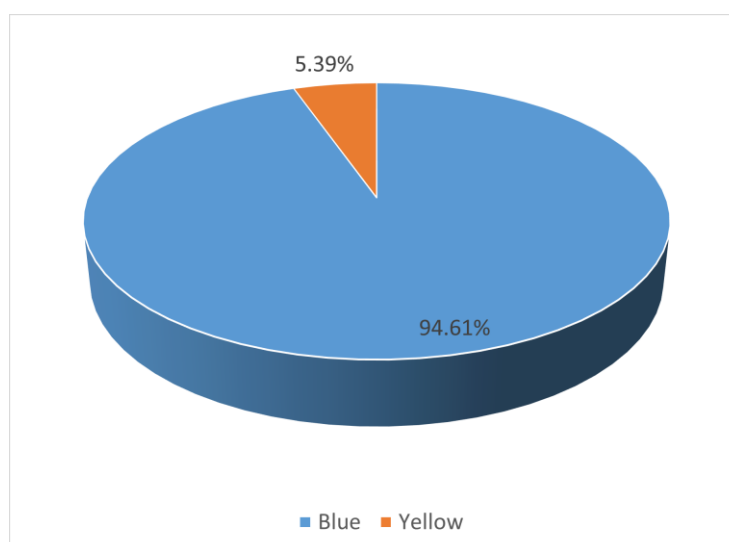

(b) Distribution of CO emissions

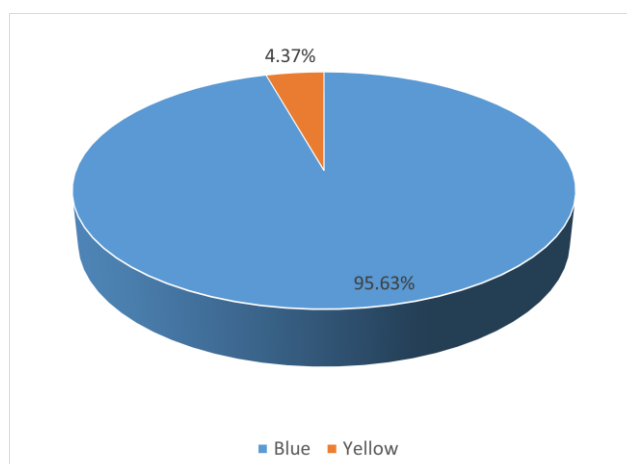

(c) Distribution of NO emissions junctions



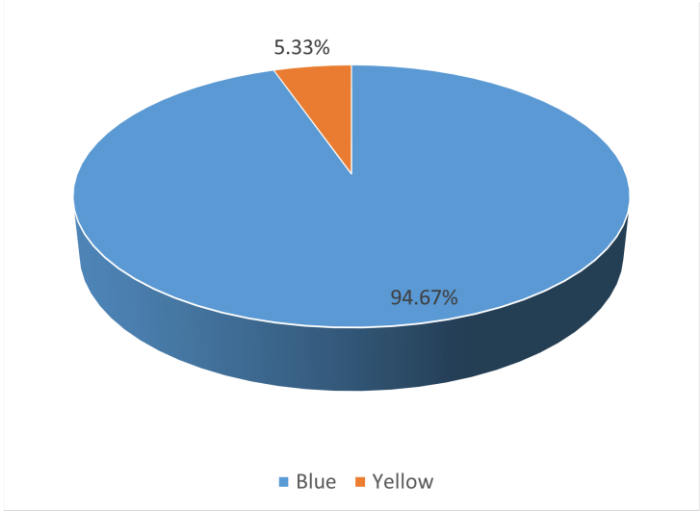

(d) Distribution of HC emissions

Figure S5. Distribution of Di\_erent Emissions.

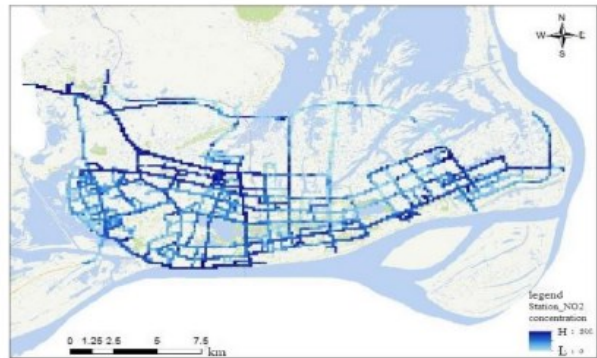

(a) Visualization of NO2 emissions

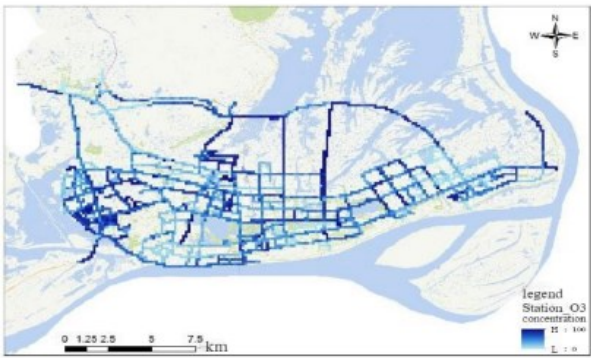

(b) Visualization of O3 emissions

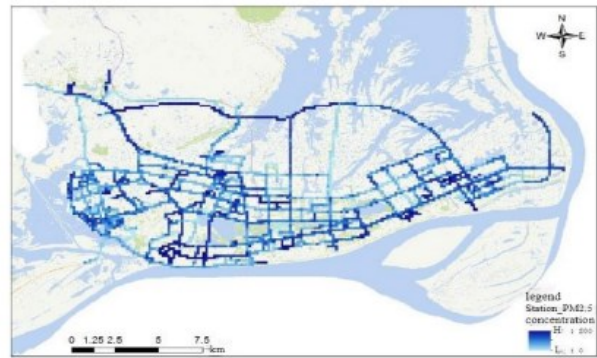

(c) Visualization of PM2.5 emissions

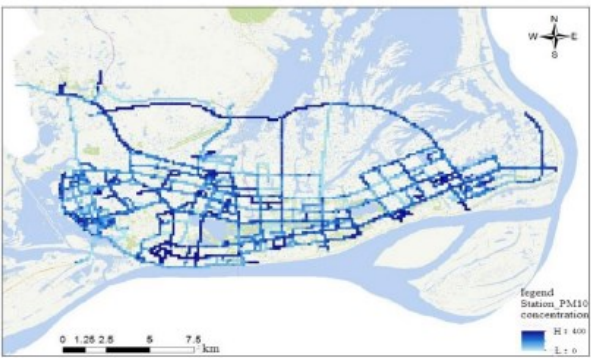

(d) Visualization of PM10 emissions

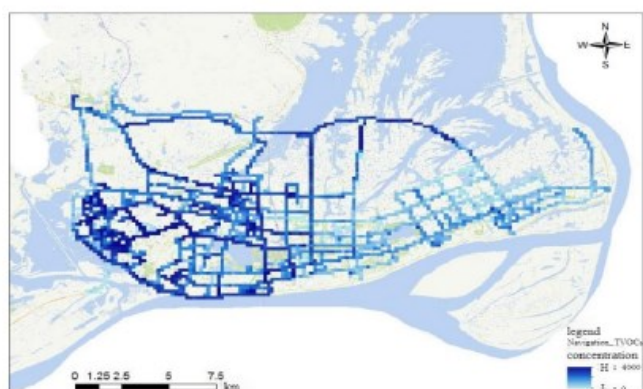

(e) Visualization of TVOCs emissions

Figure S6. Visualization of Emissions.

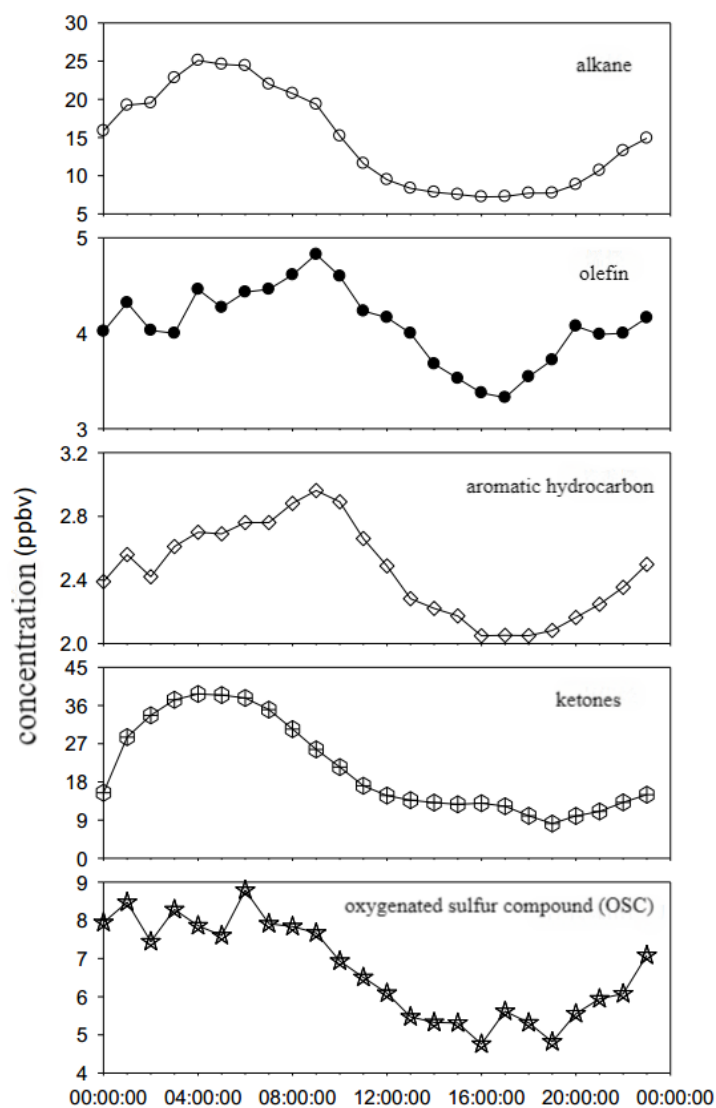

Figure S7. Daily trends of different types of VOCs.

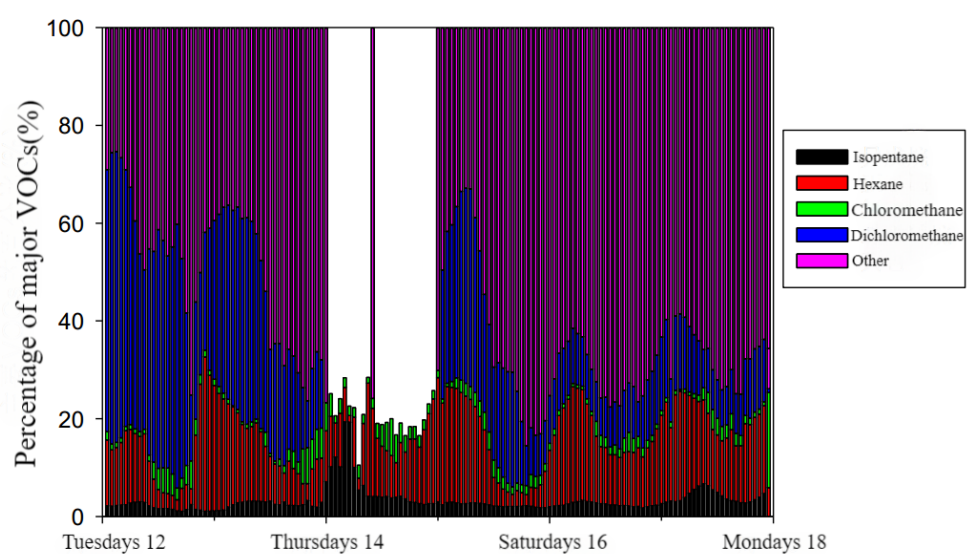

**Figure S8.** Major VOCs percentage of TVOCs.
